# Supplementary material
Source: MDPI journal article supplement (https://www.mdpi.com/2313-0105/10/2/40)
Supplement: s1 [file s1 › batteries-2813855-supplementary.pdf]

# Spherical Graphite Anodes: Influence of Particle Size Distribution and Multilayer Structuring in Lithium-Ion Battery Cells

Laura Gottschalk <sup>1,2,\*</sup>, Jannes Müller <sup>1,2</sup>, Alexander Schoo <sup>1,2</sup>, Ernesto Baasch <sup>1,2</sup> and Arno Kwade <sup>1,2</sup>

<sup>1</sup> TU Braunschweig, Institute for Particle Technology, 38104 Braunschweig, Germany

<sup>2</sup> Battery LabFactory Braunschweig, TU Braunschweig, 38106 Braunschweig, Germany

\* To whom correspondence should be addressed: l.gottschalk@tu-braunschweig.de

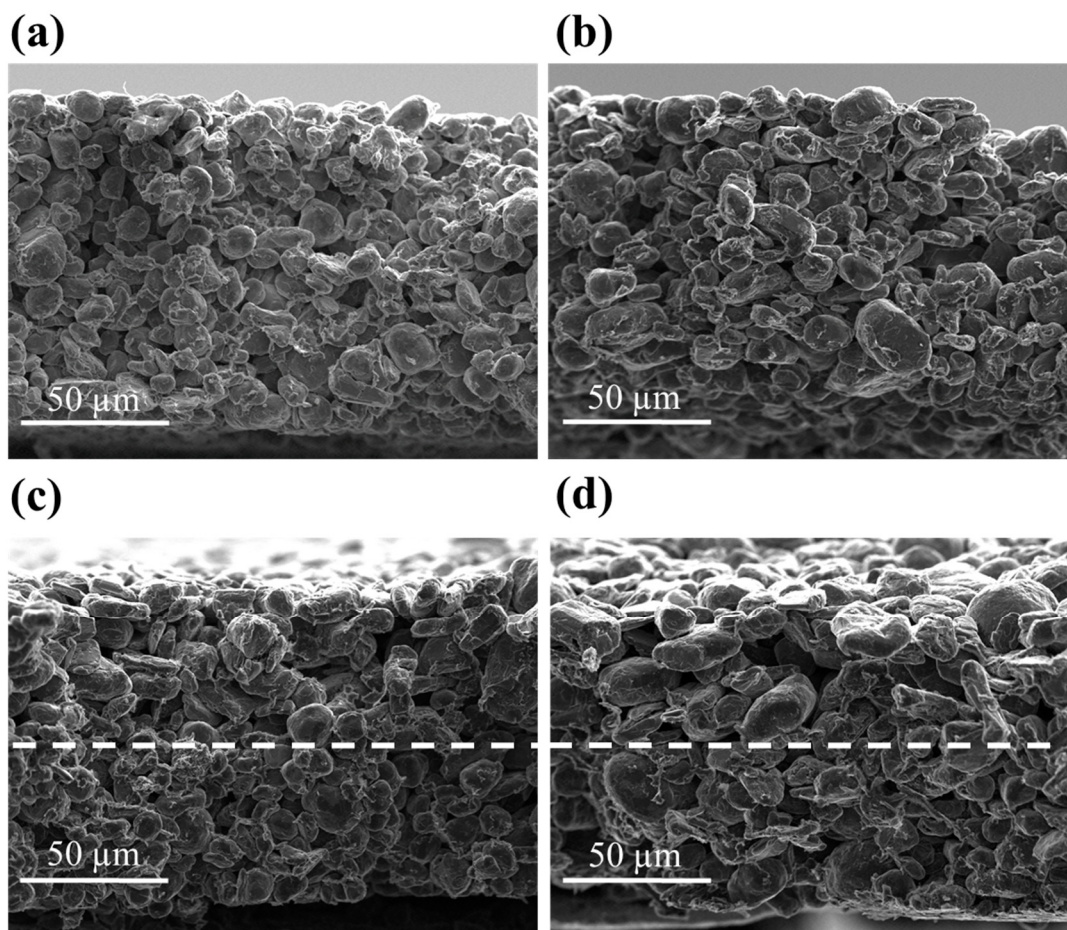

**Figure S1.** SEM images of the one-layered and two-layered anodes with different ratios of spherical Gr <sub>11</sub> and Gr <sub>18</sub>. One-layered anodes: (a) Gr <sub>18/25</sub> + 11/75, (b) Gr <sub>18/75</sub> + 11/25. Two-layered anodes: (c) Gr <sub>18/25</sub> + 11/75 in the lower layer, (d) Gr <sub>18/75</sub> + 11/25 in the lower layer. All two-layered anodes consist of Gr <sub>18/100</sub> in the upper layer. The images show the cross-section of the anodes. All images were taken with a magnification of 1,500 x.

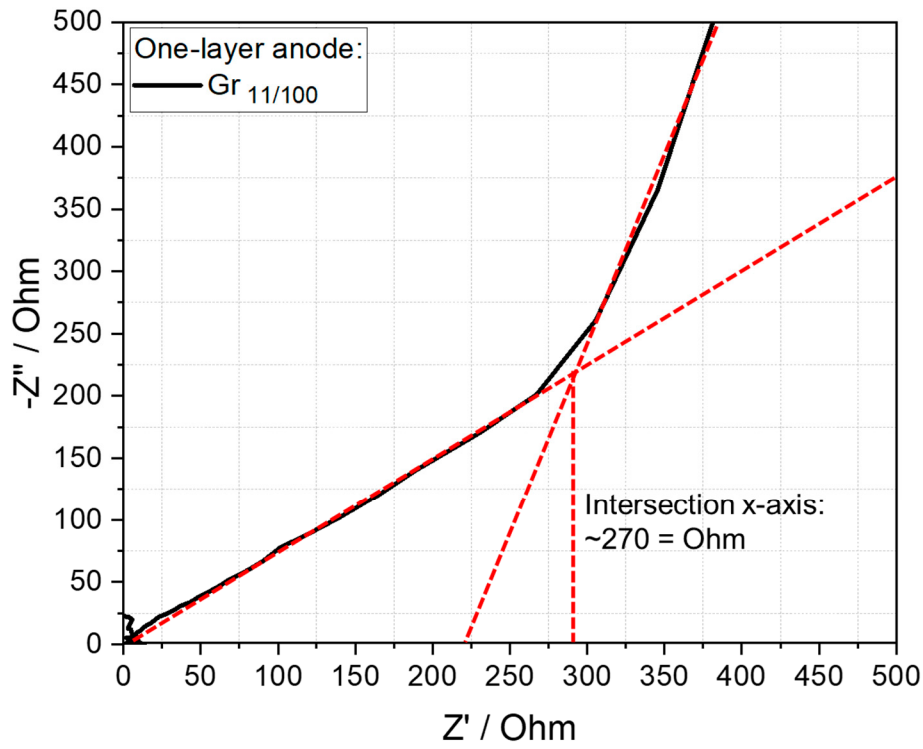

**Figure S2.** Exemplary impedance spectra of  $G_{11}$ . The red dotted lines represent the manual determination of the extension of the low-frequency line to the x axis. If the point of intersection is multiplied by the x axis times 3 and related to the area of the anode, the result is an areal ionic resistance of about  $\sim 810 \text{ Ohm cm}^2$ . [According to the methodology of Ogiwara et al. [1]].

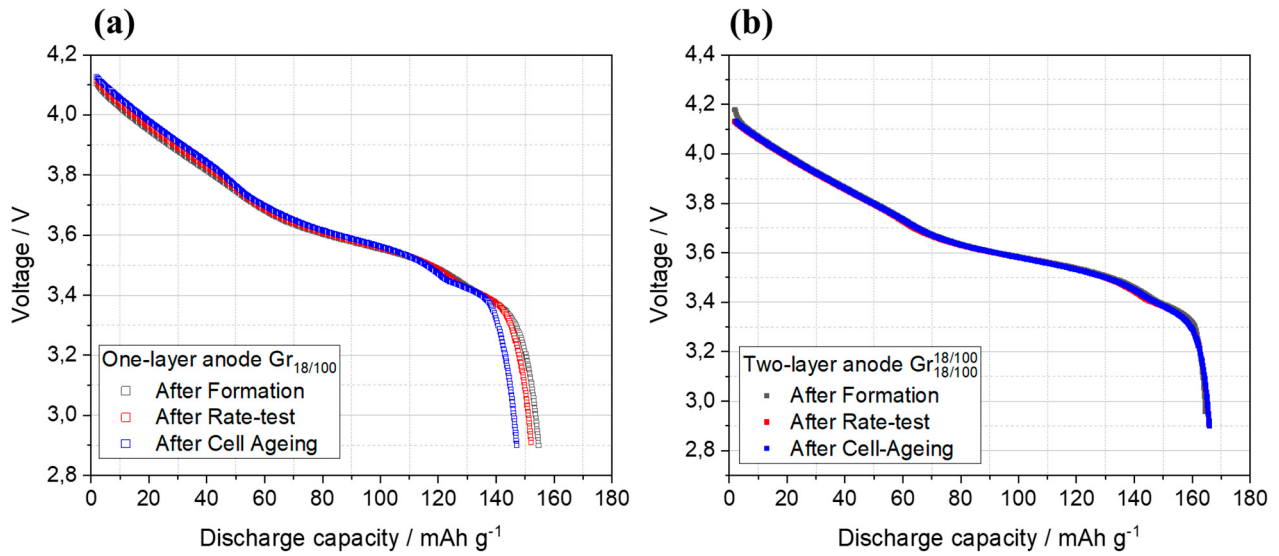

**Figure S3.** Discharge curves of one-layer electrode  $Gr_{18/100}$  (a) as well as the two-layer anode  $Gr_{18/100}^{18/100}$  (b) are shown. Thereby, the discharge curves after formation after rate-test and after the cell-ageing is shown.

## Reference

- [1] N. Ogihara, S. Kawauchi, C. Okuda, Y. Itou, Y. Takeuchi, Y. Ukyo, J. Electrochem. Soc. 159 (2012) A1034-A1039. <https://doi.org/10.1149/2.057207jes>.
